# Supplementary material for: Deciphering Ketamine’s Dual Outcomes: Distinguishing Psychotic from Antidepressant Effects, and Their Temporal Dynamics in Mice
Source: Research Square preprint supplement (doi:10.21203/rs.3.rs-4449427/v1), 2024-06-06
Supplement: Supplementary file 1 [file 380331898655b64a5b987f92.xlsx]

## Sheet: NORT
	Inmediate							2 Hours
Dose	Trainig exploration	Test exploration	Absolute Discrimination	Discrimination Index	Preference Index		Dose	Trainig exploration	Test exploration	Absolute Discrimination	Discrimination Index	Preference Index
Saline	107.6	115.8	83.6	0.721934	86.0967		Saline	64.4	47	21.2	0.451064	72.5532
Saline	92	93.7	69.7	0.743863	87.1932		Saline	31.5	101.9	37.1	0.714836	85.7418
Saline	57.6	53.4	46.6	0.872659	93.633		Saline	54	148.2	47.2	0.318489	65.9244
Saline	124.2	67.3	51.7	0.768202	88.4101		Saline	81.4	92.6	40.4	0.436285	71.8143
Saline	83.2	49.9	40.5	0.811623	90.5812		Saline	46.9	42.5	19.1	0.449412	72.4706
Saline	93	62.6	47.8	0.763578	88.1789		Saline	58.2	65.3	33.3	0.509954	75.4977
Saline	74.8	78.3	48.1	0.614304	80.7152		Saline	48.8	75.5	34.3	0.618018	80.9009
Saline	104.2	133	105.6	0.793985	89.6992		Saline	86.5	177.3	101.3	0.571348	78.5674
Saline	124.4	131	119.6	0.912977	95.6489		Saline	66.9	107.6	46	0.427509	71.3755
5 mg/kg	103	142.2	66.6	0.468354	73.4177		5 mg/kg	42.3	25.2	0.8	0.031746	51.5873
5 mg/kg	64	126.2	42	0.332805	66.6403		5 mg/kg	121.3	138.5	50.3	0.363177	68.1588
5 mg/kg	114.7	116.3	64.3	0.55288	77.644		5 mg/kg	97.8	123.3	79.9	0.648013	82.4006
5 mg/kg	82.8	83.2	20.8	0.25	62.5		5 mg/kg	49	101.3	68.7	0.678184	83.9092
5 mg/kg	95.7	108	26	0.240741	62.037		5 mg/kg	107	80.4	59.8	0.743781	87.1891
5 mg/kg	109.3	67.5	11.9	0.176296	58.8148		5 mg/kg	71.5	87.8	54.6	0.621868	81.0934
30 mg/kg	80.2	28.4	10.8	0.157895	57.8947		30 mg/kg	44.5	95.8	16.2	0.290323	64.5161
30 mg/kg	98.9	22.8	2.8	0.122807	56.1404		30 mg/kg	58.6	119	63	0.529412	76.4706
30 mg/kg	85.4	41.7	4.3	0.103118	55.1559		30 mg/kg	48.9	30.9	7.5	0.242718	62.1359
30 mg/kg	57.9	49.3	0.7	0.0141988	50.7099		30 mg/kg	44.5	75.2	43.4	0.577128	78.8564
30 mg/kg	107	26.5	11.1	0.418868	70.9434		30 mg/kg	87.7	94.8	38	0.400844	70.0422
30 mg/kg	65.1	23.2	3.2	0.137931	56.8966		30 mg/kg	91.8	96.1	60.5	0.629553	81.4776
						Outliers
						*** Grub Test

## Sheet: TST
	2 Hours
Dose	Inmobility
Saline	186
Saline	234
Saline	183
Saline	193
Saline	166
Saline	161
Saline	166
Saline	179
5 mg/kg	58
5 mg/kg	136
5 mg/kg	7
5 mg/kg	92
5 mg/kg	49
5 mg/kg	143
30 mg/kg	44
30 mg/kg	81
30 mg/kg	86
30 mg/kg	176
30 mg/kg	26
30 mg/kg	34

## Sheet: FST
	24 hours					7 Days
Dose	Climbing	Swimming	Inmobility		Dose	Climbing	Swimming	Inmobility
Saline	34	120	87		Saline	42	80	119
Saline	67	75	99		Saline	30	47	164
Saline	9	24	208		Saline	46	84	111
Saline	0	67	174		Saline	33	40	168
Saline	3	53	185		Saline	0	36	205
Saline	2	58	181		Saline	11	145	86
Saline	0	64	177		Saline	56	16	169
Saline	1	22	218		Saline	29	59	153
Saline	6	59	176		5 mg/kg	29	59	153
5 mg/kg	65	117	59		5 mg/kg	3	117	121
5 mg/kg	164	72	5		5 mg/kg	19	43	179
5 mg/kg	228	13	0		5 mg/kg	14	93	134
5 mg/kg	132	102	8		5 mg/kg	31	55	155
5 mg/kg	161	57	23		5 mg/kg	67	34	140
5 mg/kg	235	6	0		30 mg/kg	14	93	134
30 mg/kg	73	148	20		30 mg/kg	40	26	175
30 mg/kg	157	73	11		30 mg/kg	67	34	140
30 mg/kg	17	148	77		30 mg/kg	34	27	180
30 mg/kg	72	102	67		30 mg/kg	0	49	192
30 mg/kg	36	97	108		30 mg/kg	25	68	148
30 mg/kg	50	186	5
				Outliers
				*** Grub Test

## Sheet: EVO. Exploration
	NORT Inmediate														NORT 2 hours
ID	Test	Dose	0-1 min	1-2 min	2-3 min	3-4 min	4-5 min	5-6 min	6-7 min	7-8 min	8-9 min	9-10 min		ID	Test	Dose	0-1 min	1-2 min	2-3 min	3-4 min	4-5 min	5-6 min	6-7 min	7-8 min	8-9 min	9-10 min
1	Training Phase	Saline	8.7	6.1	10.6	8.9	10.7	15.8	16.7	8.5	8.1	13.5		1	Training Phase	Saline	4.3	4.4	7.2	9.2	2.1	5.9	9.4	9.7	5.4	6.8
2	Training Phase	Saline	8.5	3.1	14.4	8	8.4	18.3	5.3	6	4.3	15.7		2	Training Phase	Saline	5.3	1.1	2.1	2.1	4.6	0	3.7	2.2	5	5.4
3	Training Phase	Saline	6.3	7.2	3.3	6.7	11	6.1	8.3	3.8	2.1	2.8		3	Training Phase	Saline	3.3	3.4	3.7	5.8	2.9	10.6	6.7	2.1	7.3	6.1
4	Training Phase	Saline	12.3	19	12.9	14.5	6.7	13.4	11.3	17.4	2.6	14.1		4	Training Phase	Saline	6	13.4	6.2	8.8	7.9	13.2	12	3.6	5.2	5.1
5	Training Phase	Saline	28.2	9.7	13.5	6.2	3.1	1.5	8.5	4.5	1.6	6.4		5	Training Phase	Saline	3.3	1.3	0.6	13.8	2.7	2.7	7.6	7.6	2.8	3.9
6	Training Phase	Saline	25.3	11.9	18.4	3.5	6.3	5.7	1	5.8	8.2	6.9		6	Training Phase	Saline	7.3	11.9	7.2	1.6	7.9	3.7	6.4	5	2.1	2.2
7	Training Phase	Saline	7.1	11.3	9.8	6.8	7.6	2.6	7.2	12.5	5.6	4.3		7	Training Phase	Saline	5.8	4.1	3.8	4.8	4	6.2	1.4	10.1	4.7	3.9
8	Training Phase	Saline	23.5	15.9	5.7	8.4	7.4	2.5	12.7	13.4	9.1	5.7		8	Training Phase	Saline	6.4	11.3	8.3	5.7	8.2	1.7	4.4	12.8	20.1	7.3
9	Training Phase	Saline	23.9	15.1	14.4	23.6	11	14.6	5.3	1.1	9.5	5.9		9	Training Phase	Saline	1.5	4.7	10.4	2.5	9.9	11.9	7.2	9	6.4	3.4
10	Training Phase	5 mg/kg	29.6	12.2	16.9	6.8	13	5.4	7.6	4.5	2.4	4.6		10	Training Phase	5 mg/kg	3	6.9	1.6	1.9	1.1	13.3	6.9	0.8	5.8	1
11	Training Phase	5 mg/kg	10.9	12.1	9.2	7.7	3	2	10.1	2.9	5.5	0.6		11	Training Phase	5 mg/kg	15.3	9.2	10.7	17.3	7.7	4.4	16.3	12.2	11.2	17.5
12	Training Phase	5 mg/kg	17.4	13.5	16.3	7.8	11.7	25.3	3.6	11.1	5.1	3.5		12	Training Phase	5 mg/kg	13.5	12.1	14.4	4	6.3	6.2	10.1	18.4	6.2	7.7
13	Training Phase	5 mg/kg	12.3	6	7.6	9.7	13	10.7	10.9	4.6	2.6	6.6		13	Training Phase	5 mg/kg	2.7	0.4	0	2.5	6.9	0.8	4.9	2.4	12.9	16.6
14	Training Phase	5 mg/kg	6.4	6.2	16.8	6.9	20.9	6.9	10	10.9	6	4.7		14	Training Phase	5 mg/kg	12.9	13	9.8	4	21.3	8.6	12	12.7	10.7	2
15	Training Phase	5 mg/kg	10.3	9.4	17.6	14.7	15.7	10.2	6.2	9.2	7.1	1.3		15	Training Phase	5 mg/kg	3.7	6.9	5.2	8	8.9	14	3.5	18.2	3.1	0
16	Training Phase	30 mg/kg	8.6	9.8	8.8	11.5	14.6	6.9	7.8	4.5	2.2	5.5		16	Training Phase	30 mg/kg	3.5	3.9	2.8	7.3	1.2	4.4	9.1	1.4	3.5	4.6
17	Training Phase	30 mg/kg	21.9	18.3	12.5	8.5	10.1	10.3	6.6	3.3	5.3	2.1		17	Training Phase	30 mg/kg	6.5	6.9	10.8	9.2	1.2	5.3	9.1	1.4	3.5	4.6
18	Training Phase	30 mg/kg	27.5	11.2	9.5	5.6	5.1	6.2	7.7	4.4	3.1	5.1		18	Training Phase	30 mg/kg	2.5	7.5	1.6	3.4	1.5	13.3	8.6	1.2	7	2.3
19	Training Phase	30 mg/kg	5.4	1.8	6.4	7.3	4.3	6.9	8.1	9.9	3	4.7		19	Training Phase	30 mg/kg	6.6	4.9	2.2	0	6.8	3.7	5.5	3.6	1.3	9.9
20	Training Phase	30 mg/kg	27.7	12.7	8.9	9.5	7.2	3.4	12.2	10.8	9.5	7.1		20	Training Phase	30 mg/kg	13	20.2	8.5	3.8	9	2.8	3.6	6.6	6.2	16
21	Training Phase	30 mg/kg	9.4	10.2	13.7	1.7	7.9	3.8	5.5	4	7.9	1		21	Training Phase	30 mg/kg	16.5	14.8	8.5	9.8	7.1	2.4	11.7	10.8	4.9	5.3
22	Test Phase	Saline	4.4	28.3	15.8	13.6	20.3	10.9	4.5	3.5	1.9	13.2		22	Test Phase	Saline	4.6	0	0	3.9	6.7	10.2	6.2	6.7	4.1	4.6
23	Test Phase	Saline	12.5	18.4	14	10.2	5.4	9.8	4	6.5	9.3	3.6		23	Test Phase	Saline	26.9	1.6	4.9	4.6	2	1.5	6.9	1	1.1	1.4
24	Test Phase	Saline	10.7	10.5	2.1	5	1.4	10.3	6.3	0	1.1	6		24	Test Phase	Saline	18.3	4.7	29.4	8.2	14.7	27	16.6	8.9	7.8	9.6
25	Test Phase	Saline	5	22.5	8.7	6.8	0.7	14.5	0.4	3.2	2.4	3.1		25	Test Phase	Saline	7.4	14.3	17	9.5	5.5	9.3	10.4	10.2	4.4	4.6
26	Test Phase	Saline	16.9	15.7	7.2	2.1	0	6.4	0	0	1.6	0		26	Test Phase	Saline	3.8	6.5	0	8.4	3.7	6.5	11.8	1.8	0	0
27	Test Phase	Saline	16.3	6.7	5.8	5.4	1.3	7.5	3	3.4	9.5	3.7		27	Test Phase	Saline	13.3	1.4	10.3	4.4	4.2	9.3	5.4	6.2	5.5	3.8
28	Test Phase	Saline	15.3	12.2	6.4	3.6	5.6	9.3	4.1	0	7.5	14.3		28	Test Phase	Saline	17	3	4.3	9.7	4.5	2.5	4.2	4.2	1.7	4.4
29	Test Phase	Saline	30.5	2.4	6.7	17.8	25.7	15.2	19.2	9.4	6.1	0.2		29	Test Phase	Saline	2.8	0	23.6	14.7	24.9	21.5	14.1	13.1	24.6	38.5
30	Test Phase	Saline	31.8	15.9	15.8	16.7	10.7	9.9	8.6	5.7	8.4	6.7		30	Test Phase	Saline	0	21.3	24.5	5.8	4.9	6.2	16.1	5.4	1.5	1.9
31	Test Phase	5 mg/kg	2.8	0	7.6	17.2	9.9	18.7	26.1	27.6	17.1	15.2		31	Test Phase	5 mg/kg	1.1	1.5	4.9	0	2.5	1.6	2.8	3.6	5.1	2.1
32	Test Phase	5 mg/kg	0.5	0.2	3	8.9	20.4	14.3	17.7	20	26.1	15.9		32	Test Phase	5 mg/kg	23.5	14.8	11	9.3	14.4	22.8	6	11.5	22.3	2.9
33	Test Phase	5 mg/kg	7.3	9	3.1	6.9	9.4	13.7	18.5	17.4	10.8	20.2		33	Test Phase	5 mg/kg	11.9	9	14.8	12.4	10.7	9.3	10.8	11.1	8.4	4
34	Test Phase	5 mg/kg	0.3	0	0.7	3.3	8.1	11.6	12.7	17.2	11.1	18.3		34	Test Phase	5 mg/kg	21.4	14.7	0.7	0.3	11.4	12.5	5.4	5.8	20.1	10
35	Test Phase	5 mg/kg	8.5	13.9	13.3	9	7.9	13.8	8.7	8.6	16.9	7.4		35	Test Phase	5 mg/kg	4.9	12.5	4.9	16.1	8.3	1.6	12.4	6.5	1.3	11.9
36	Test Phase	5 mg/kg	6.7	3.3	1.2	4.1	0	0.4	2.1	0	10	12.1		36	Test Phase	5 mg/kg	7.2	6.4	8.4	0.1	4.2	32.8	25.1	0.3	0	3.3
37	Test Phase	30 mg/kg	2.2	5.7	4.8	5.9	7.4	6.9	8.4	11.5	4.9	10.7		37	Test Phase	30 mg/kg	7.6	8.2	1.4	5.2	10.4	2.5	4.1	1	2.2	12.4
38	Test Phase	30 mg/kg	0	0	0	0	0	3.1	10.8	7	0	1.9		38	Test Phase	30 mg/kg	27.6	19.9	9.8	5.2	10.4	7.5	4.1	10.7	12.2	12.4
39	Test Phase	30 mg/kg	0.4	0	0.5	1	5.5	3.6	9.3	5	8.1	8.3		39	Test Phase	30 mg/kg	1.1	1	5	0	2.2	2.6	4.6	5	6.3	3.3
40	Test Phase	30 mg/kg	2.6	1.5	1.8	3	3.3	3.7	1.1	2.3	10	20.5		40	Test Phase	30 mg/kg	8	8.7	7.7	8.3	10.7	4.2	6.5	5.9	3.4	11.8
41	Test Phase	30 mg/kg	0	0	4	0	0	2.4	2.4	2.7	2.9	12.1		41	Test Phase	30 mg/kg	13.8	13.1	14.9	5.3	8.9	12.2	13.2	5.7	4.3	5.4
42	Test Phase	30 mg/kg	2.7	0	0	0	0	0	0	0	1.3	19.2		42	Test Phase	30 mg/kg	3.9	2.6	16.7	11.9	14.1	12.3	3.7	3.6	14.2	12.7
												Outliers
												*** Grub Test

## Sheet: EVO. Discrimination
	NORT Inmediate
ID	Test	Variable	Dose	0-1 min	1-2 min	2-3 min	3-4 min	4-5 min	5-6 min	6-7 min	7-8 min	8-9 min	9-10 min
1	Test Phase	Absolute Discrimination	Saline	2.1	26.4	9.9	9.7	16.2	1.2	0.7	3.5	0.5	9.2
2	Test Phase	Absolute Discrimination	Saline	9.6	16.5	11.7	5	2.4	6.8	4	1.3	5.7	3.6			Outliers
3	Test Phase	Absolute Discrimination	Saline	7.3	10.5	2.1	5	1.4	5.7	6.3	0	1.1	6
4	Test Phase	Absolute Discrimination	Saline	2.5	17.5	4.5	3.3	-0.7	12.7	-0.4	3.2	2.4	3.1
5	Test Phase	Absolute Discrimination	Saline	13.2	14.1	1.5	2.1	0	2.2	0	0	1.6	0
6	Test Phase	Absolute Discrimination	Saline	15	4.1	5.8	4.4	0.3	6.7	2.1	2	7.6	-0.5
7	Test Phase	Absolute Discrimination	Saline	9.8	8.6	3.5	1.5	4.3	2.9	2.1	0	3.7	8.9
8	Test Phase	Absolute Discrimination	Saline	27.5	1.8	5.7	15.6	21.9	10.2	13.8	1.7	3.6	0
9	Test Phase	Absolute Discrimination	Saline	30.6	15.9	8.7	7.9	10.7	6.3	8	3.7	2.7	6.7
10	Test Phase	Absolute Discrimination	5 mg/kg	1	0	-4.4	6.1	8.1	11.1	-2	23.1	8.9	12
11	Test Phase	Absolute Discrimination	5 mg/kg	0.5	2.8	0.4	7.3	12.4	12.2	16.8	17.2	18.9	6.5
12	Test Phase	Absolute Discrimination	5 mg/kg	5.5	4.1	0.9	0.5	2.2	11.8	5.4	10.2	10.8	17
13	Test Phase	Absolute Discrimination	5 mg/kg	-0.3	0	0.7	2.8	3.3	2.4	-3.3	7.8	3.9	6.4
14	Test Phase	Absolute Discrimination	5 mg/kg	0.7	6.2	1.7	-1.9	2.2	3.2	4.9	0.6	9.7	12.6
15	Test Phase	Absolute Discrimination	5 mg/kg	0.7	2.3	2.9	4.1	8.3	-1.6	9.2	2.3	6.1	12.1
16	Test Phase	Absolute Discrimination	30 mg/kg	1.4	-0.7	2	1.3	-0.4	2.1	3.7	3.3	-0.3	0
17	Test Phase	Absolute Discrimination	30 mg/kg	0	0	0	0	0	3.1	4.8	-7	0	1.9
18	Test Phase	Absolute Discrimination	30 mg/kg	-0.4	0	0.5	-1	0	3	-4.9	2.9	-0.4	-3.2
19	Test Phase	Absolute Discrimination	30 mg/kg	3.8	1.2	0.6	0.8	-1.3	1.5	-0.9	8.2	-0.2	11.8
20	Test Phase	Absolute Discrimination	30 mg/kg	0	0	4.4	0	0	2.4	0.4	-2.7	0.9	6.5
21	Test Phase	Absolute Discrimination	30 mg/kg	-2.7	0	0	0	0	0	0	0	1.3	4.6
1	Test Phase	Old Object	Saline	1.1	0.6	0	1.6	2	4.7	1.9	0	0.7	2
2	Test Phase	Old Object	Saline	0.7	0.6	0.7	2.6	1.5	1.5	0	2.6	1.8	0
3	Test Phase	Old Object	Saline	1.7	0	0	0	0	2.3	0	0	0	0
4	Test Phase	Old Object	Saline	0.8	2.5	0.8	1.7	0.7	0.9	0.4	0	0	0
5	Test Phase	Old Object	Saline	1.1	0.8	0	0	0	2.1	0	0	0	0
6	Test Phase	Old Object	Saline	0.6	1.3	0	0.5	0.5	0.4	0.4	0.7	0.4	2.1
7	Test Phase	Old Object	Saline	2	1.4	1.1	1	0.5	3.2	1	0	1.9	2.7
8	Test Phase	Old Object	Saline	1.5	0	0.5	1.1	1.9	2.5	3.3	2.4	0	0
9	Test Phase	Old Object	Saline	0.6	0	2.8	4	0	1.8	0.3	0.8	2.6	0
10	Test Phase	Old Object	5 mg/kg	0.9	0	5.8	5.5	0.9	3.1	12.8	2.2	3.6	1.6
11	Test Phase	Old Object	5 mg/kg	0	3.7	4.3	5.4	3.9	0.9	0.4	1.4	3.6	1.7
12	Test Phase	Old Object	5 mg/kg	0.9	2.1	1.9	3.1	3.8	0.7	5.9	3.5	0	1.6
13	Test Phase	Old Object	5 mg/kg	0.3	0	0	1	2.2	4.2	8.5	4.7	3.6	6.4
14	Test Phase	Old Object	5 mg/kg	4.3	4	4.2	5.3	3.2	4.9	2	4.3	3.5	2.8
15	Test Phase	Old Object	5 mg/kg	2.1	0.6	1	0	0	1.6	0.4	2.1	2.1	0
16	Test Phase	Old Object	30 mg/kg	0.3	3	1.4	2.3	3.9	2.4	2.2	3.7	2.6	5
17	Test Phase	Old Object	30 mg/kg	0	0	0	0	0	0	3	7	0	6
18	Test Phase	Old Object	30 mg/kg	0.4	0	0	1	0.6	0.3	7.1	1	3.4	4.9
19	Test Phase	Old Object	30 mg/kg	0.9	0	0.6	1.1	4.8	1.1	1	1.3	5.1	3.5
20	Test Phase	Old Object	30 mg/kg	0	0	0.8	0	0	0	1	2.7	1	1.4
21	Test Phase	Old Object	30 mg/kg	2.7	0	0	0	0	0	0	0	0	7.3
1	Test Phase	New Object	Saline	3.2	27	9.9	11.3	18.2	5.9	2.6	3.5	1.2	11.2
2	Test Phase	New Object	Saline	10.3	17.1	12.4	7.6	3.9	8.3	4	3.9	7.5	3.6
3	Test Phase	New Object	Saline	9	10.5	2.1	5	1.4	8	6.3	0	1.1	6
4	Test Phase	New Object	Saline	3.3	20	5.3	5	0	13.6	0	3.2	2.4	3.1
5	Test Phase	New Object	Saline	14.3	14.9	1.5	2.1	0	4.3	0	0	1.6	0
6	Test Phase	New Object	Saline	15.6	5.4	5.8	4.9	0.8	7.1	2.5	2.7	8	1.6
7	Test Phase	New Object	Saline	11.8	10	4.6	2.5	4.8	6.1	3.1	0	5.6	11.6
8	Test Phase	New Object	Saline	29	1.8	6.2	16.7	23.8	12.7	17.4	4.1	3.6	0
9	Test Phase	New Object	Saline	31.2	15.9	11.5	11.9	10.7	8.1	8.3	4.5	5.3	6.7
10	Test Phase	New Object	5 mg/kg	1.9	0	1.4	11.6	9	14.2	10.8	25.3	12.5	13.6
11	Test Phase	New Object	5 mg/kg	0.5	6.5	4.7	12.7	16.3	13.1	17.2	18.6	22.5	8.2
12	Test Phase	New Object	5 mg/kg	6.4	6.2	2.8	3.6	6	12.5	11.3	13.7	10.8	18.6
13	Test Phase	New Object	5 mg/kg	0	0	0.7	3.8	5.5	6.6	5.2	12.5	7.5	12.8
14	Test Phase	New Object	5 mg/kg	5	10.2	5.9	3.4	5.4	8.1	6.9	4.9	13.2	15.4
15	Test Phase	New Object	5 mg/kg	2.8	2.9	3.9	4.1	8.3	0	9.6	4.4	8.2	12.1
16	Test Phase	New Object	30 mg/kg	1.7	2.3	3.4	3.6	3.5	4.5	5.9	7	2.3	5
17	Test Phase	New Object	30 mg/kg	0	0	0	0	0	3.1	7.8	0	0	1.9
18	Test Phase	New Object	30 mg/kg	0	0	0.5	0	4.9	3.3	2.2	3.9	3	1.7
19	Test Phase	New Object	30 mg/kg	4.7	1.2	1.2	1.9	3.5	2.6	0.1	9.5	4.9	15.3
20	Test Phase	New Object	30 mg/kg	0	0	5.2	0	0	2.4	1.4	0	1.9	7.9
21	Test Phase	New Object	30 mg/kg	0	0	0	0	0	0	0	0	1.3	11.9

## Sheet: EVO. Ataxia Level
	NORT Inmediate														NORT 2 hours
ID	Test	Dose	0-1 min	1-2 min	2-3 min	3-4 min	4-5 min	5-6 min	6-7 min	7-8 min	8-9 min	9-10 min		ID	Test	Dose	0-1 min	1-2 min	2-3 min	3-4 min	4-5 min	5-6 min	6-7 min	7-8 min	8-9 min	9-10 min
1	Training Phase	Saline	0.55	0.466667	0.383333	0.533333	0.615385	0.45	0.583333	0.333333	0.55	0.590164		1	Training Phase	Saline	0.283333	0.466667	0.25	0.583333	0.410256	0.433333	0.483333	0.366667	0.116667	0.459016
2	Training Phase	Saline	0.35	0.233333	0.366667	0.283333	0.333333	0.55	0.333333	0.5	0.233333	0.557377		2	Training Phase	Saline	0.133333	0.35	0.283333	0.316667	0.461538	0.216667	0	0	0	0
3	Training Phase	Saline	2.48333	0.933333	0.383333	0.45	0.358974	0.433333	0.466667	0.433333	0.25	0.42623		3	Training Phase	Saline	0.183333	0.25	0.216667	0.2	0.307692	0.45	0.183333	0.283333	0.25	0.409836
4	Training Phase	Saline	0.283333	0.466667	0.25	0.583333	0.410256	0.433333	0.483333	0.366667	0.116667	0.459016		4	Training Phase	Saline	0.5	0.383333	0.25	0.3	0.461538	0.4	0.266667	0.25	0.366667	0.245902
5	Training Phase	Saline	1.05	0.45	0.466667	0.4	0.153846	0.483333	0.3	0.4	0.533333	0.42623		5	Training Phase	Saline	0.383333	0.333333	0.283333	0.283333	0.435897	0.483333	0.416667	0.266667	0.416667	0.196721
6	Training Phase	Saline	0.383333	0.366667	0.466667	0.316667	0.153846	0.333333	0.15	0.333333	0.45	0.377049		6	Training Phase	Saline	0.25	0.25	0.35	0.283333	0.282051	0.35	0.416667	0.35	0.366667	0.393443
7	Training Phase	Saline	1.78333	0.416667	0.366667	0.383333	0.307692	0.333333	0.366667	0.383333	0.266667	0.196721		7	Training Phase	Saline	0.25	0.35	0.383333	0.233333	0.333333	0.433333	0.216667	0.266667	0.366667	0.278689
8	Training Phase	Saline	0.383333	0.616667	0.35	0.533333	0.393443	0.466667	0.25	0.583333	0.410256	0.433333		8	Training Phase	Saline	0.233333	0.4	0.25	0.25	0.153846	0.216667	0.216667	0.333333	0.25	0.278689
9	Training Phase	Saline	0.283333	0.233333	0.333333	0.233333	0.333333	0.333333	0.316667	0.266667	0.416667	0.147541		9	Training Phase	Saline	0.283333	0.466667	0.25	0.583333	0.410256	0.433333	0.483333	0.366667	0.116667	0.459016
10	Training Phase	5 mg/kg	0.533333	0.316667	0.316667	0.416667	0.487179	0.266667	0.35	0.1	0.216667	0.295082		10	Training Phase	5 mg/kg	1.05	0.45	0.466667	0.4	0.153846	0.483333	0.3	0.4	0.533333	0.42623
11	Training Phase	5 mg/kg	0.5	0.35	0.45	0.316667	0.179487	0.2	0.216667	0.366667	0.3	0.606557		11	Training Phase	5 mg/kg	0.283333	0.35	0.283333	0.333333	0.410256	0.416667	0.383333	0.416667	0.383333	0.213115
12	Training Phase	5 mg/kg	0.55	0.416667	0.283333	0.233333	0.333333	0.3	0.266667	0	0.25	0.42623		12	Training Phase	5 mg/kg	0.416667	0.35	0.316667	0.366667	0.487179	0.233333	0.466667	0.533333	0.416667	0.409836
13	Training Phase	5 mg/kg	1.05	0.45	0.466667	0.4	0.153846	0.483333	0.3	0.4	0.533333	0.42623		13	Training Phase	5 mg/kg	0.5	0.233333	0.266667	0.366667	0.282051	0.366667	0.383333	0.416667	0.466667	0.344262
14	Training Phase	5 mg/kg	0.433333	0.316667	0.416667	0.233333	0.358974	0.233333	0.233333	0.25	0.166667	0.295082		14	Training Phase	5 mg/kg	0	0.0166667	0	0.1	0.0769231	0.0166667	0.0166667	0.05	0.4	0.245902
15	Training Phase	5 mg/kg	0.4	0.416667	0.366667	0.466667	0.435897	0.25	0.366667	0.183333	0.283333	0.360656		15	Training Phase	5 mg/kg	0.25	0.35	0.366667	0.116667	0.333333	0.25	0.233333	0.366667	0.333333	0.327869
16	Training Phase	30 mg/kg	0.25	0.466667	0.683333	0.383333	0.358974	0.316667	0.45	0.216667	0.183333	0.311475		16	Training Phase	30 mg/kg	0.283333	0.233333	0.333333	0.233333	0.333333	0.333333	0.316667	0.266667	0.416667	0.147541
17	Training Phase	30 mg/kg	0.516667	0.566667	0.366667	0.316667	0.487179	0.5	0.333333	0.266667	0.183333	0.42623		17	Training Phase	30 mg/kg	0.1	0.233333	0.166667	0.333333	0.307692	0.35	0.35	0.216667	0.25	0.295082
18	Training Phase	30 mg/kg	1	0.833333	1	0.916667	0.692308	0.916667	0.85	0.666667	0.8	1		18	Training Phase	30 mg/kg	0.35	0.333333	0.2	0.3	0.333333	0.3	0.166667	0.3	0.233333	0.360656
19	Training Phase	30 mg/kg	0.4	0.316667	0.233333	0.333333	0.333333	0.483333	0.35	0.416667	0.366667	0.409836		19	Training Phase	30 mg/kg	0.333333	0.366667	0.316667	0.316667	0.384615	0.366667	0.35	0.466667	0.416667	0.213115
20	Training Phase	30 mg/kg	0.433333	0.383333	0.216667	0.3	0.229508	0.366667	0.316667	0.487179	0.5	0.8		20	Training Phase	30 mg/kg	0.216667	0.333333	0.4	0.358974	0.466667	0.5	0.3	0.283333	0.278689	0.344262
21	Training Phase	30 mg/kg	0.45	0.283333	0.433333	0.35	0.410256	0.416667	0.466667	0.4	0.35	0.114754		21	Training Phase	30 mg/kg	0.25	0.25	0.35	0.283333	0.282051	0.35	0.416667	0.35	0.366667	0.393443
22	Test Phase	Saline	0.466667	0.466667	0.416667	0.25	0.410256	0.433333	0.383333	0.216667	0.3	0.229508		22	Test Phase	Saline	0.25	0.35	0.383333	0.233333	0.333333	0.433333	0.216667	0.266667	0.366667	0.278689
23	Test Phase	Saline	0.366667	0.416667	0.333333	0.183333	0.0512821	0.116667	0.116667	0.233333	0.416667	0.262295		23	Test Phase	Saline	0.393443	0.316667	0.2	0.05	0.2	0.205128	0.216667	0.283333	0.183333	0.233333
24	Test Phase	Saline	1.76667	0.05	0.266667	0.166667	0.179487	0.366667	0.183333	0.15	0.266667	0.213115		24	Test Phase	Saline	0.3	0.166667	0.333333	0.216667	0.025641	0.25	0.333333	0.116667	0.0833333	0.377049
25	Test Phase	Saline	0.3	0.366667	0.1	0.35	0.205128	0.25	0.116667	0.1	0.133333	0.295082		25	Test Phase	Saline	0.166667	0.25	0.233333	0.35	0.384615	0.316667	0.35	0.4	0.266667	0.409836
26	Test Phase	Saline	0.266667	0.3	0.0666667	0.166667	0	0.233333	0	0	0.116667	0.180328		26	Test Phase	Saline	0.3	0.383333	0.35	0.3	0.282051	0.35	0.283333	0.383333	0.45	0.131148
27	Test Phase	Saline	0.266667	0.283333	0.3	0.433333	0.0769231	0.216667	0.333333	0.116667	0.316667	0.409836		27	Test Phase	Saline	0.2	0.316667	0.316667	0.3	0.25641	0.116667	0.216667	0.316667	0.383333	0.442623
28	Test Phase	Saline	0.55	0.416667	0.283333	0.233333	0.333333	0.3	0.266667	0	0.25	0.42623		28	Test Phase	Saline	0.4	0.316667	0.233333	0.333333	0.333333	0.483333	0.35	0.416667	0.366667	0.409836
29	Test Phase	Saline	1.05	0.45	0.466667	0.4	0.153846	0.483333	0.3	0.4	0.533333	0.42623		29	Test Phase	Saline	0.45	0.15	0.266667	0.333333	0.358974	0.216667	0.183333	0.35	0.133333	0.147541
30	Test Phase	Saline	0.433333	0.316667	0.416667	0.233333	0.358974	0.233333	0.233333	0.25	0.166667	0.295082		30	Test Phase	Saline	0.4	0.333333	0.316667	0.233333	0.384615	0.45	0.383333	0.266667	0.533333	0.360656
31	Test Phase	5 mg/kg	1.85	1.98333	1.86667	1.18333	0.179487	0.3	0.233333	0.383333	0.283333	0.278689		31	Test Phase	5 mg/kg	0	0.0166667	0.05	0.0833333	0.179487	0.383333	0.616667	0.35	0.533333	0.393443
32	Test Phase	5 mg/kg	1.98333	2.13333	2.1	1.68333	1.12821	0.0833333	0.416667	0.266667	0.25	0.393443		32	Test Phase	5 mg/kg	0.0666667	0.0666667	0.25	0	0.179487	0.3	0.0666667	0.183333	0.116667	0.0983607
33	Test Phase	5 mg/kg	2.65	2	2	2	2	1.68333	1	1	0.95	1		33	Test Phase	5 mg/kg	0.483333	0.4	0.516667	0.35	0.384615	0.433333	0.333333	0.3	0.466667	0.278689
34	Test Phase	5 mg/kg	3.55	3.08333	2.33333	2	2	2	1.5	1	0.883333	1.01667		34	Test Phase	5 mg/kg	0.233333	0.4	0.25	0.25	0.153846	0.216667	0.216667	0.333333	0.25	0.278689
35	Test Phase	5 mg/kg	2.08333	2	1.06667	1	1	1	0.766667	0.9	0.483333	0.616667		35	Test Phase	5 mg/kg	0.283333	0.466667	0.25	0.583333	0.410256	0.433333	0.483333	0.366667	0.116667	0.459016
36	Test Phase	5 mg/kg	1.85	1.98333	1.86667	1.18333	0.179487	0.3	0.233333	0.383333	0.283333	0.278689		36	Test Phase	5 mg/kg	0.233333	0.216667	0.333333	0.4	0.358974	0.466667	0.5	0.3	0.283333	0.278689
37	Test Phase	30 mg/kg	3.56667	2.23333	2.51667	2.28333	2.02564	1.95	1.93333	1.83333	1.3	1.81967		37	Test Phase	30 mg/kg	0.15	0.2	0.0666667	0.166667	0.179487	0.25	0.316667	0.2	0.333333	0.311475
38	Test Phase	30 mg/kg	3.25	3.2	3.15	3	3.30769	3.25	2.6	2.86667	3.03333	2.96721		38	Test Phase	30 mg/kg	0.233333	0.216667	0.333333	0.4	0.358974	0.466667	0.5	0.3	0.283333	0.278689
39	Test Phase	30 mg/kg	2.51667	2	1.91667	2.11667	1.38462	0.75	0.816667	0.9	0.85	0.721311		39	Test Phase	30 mg/kg	0.0666667	0.0333333	0.233333	0	0.153846	0.25	0.1	0.183333	0.166667	0.0983607
40	Test Phase	30 mg/kg	3.46667	4	4	4	3.51282	3.01667	2.93333	3.16667	2.6	2.08197		40	Test Phase	30 mg/kg	0.266667	0.3	0.383333	0.416667	0.230769	0.233333	0.15	0.3	0.2	0.327869
41	Test Phase	30 mg/kg	3.18333	3	2.55	3	3	3	3	3	2	2		41	Test Phase	30 mg/kg	0.133333	0.35	0.283333	0.316667	0.461538	0.216667	0	0	0	0
42	Test Phase	30 mg/kg	2.53333	2.8	4	4	3.75	4	3	3	2	2		42	Test Phase	30 mg/kg	0.3	0.416667	0.333333	0.15	0.333333	0.3	0.533333	0.4	0.4	0.491803
												Outliers
												*** Grub Test

## Sheet: EVO. Stereotiped Behaviour
	NORT Inmediate
ID	Test	Dose	0-1 min	1-2 min	2-3 min	3-4 min	4-5 min	5-6 min	6-7 min	7-8 min	8-9 min	9-10 min
1	Test Phase	Saline	0	0	0	0	0	0	0	0	0	0
2	Test Phase	Saline	0	0	0	0	0	0	0	0	0	0
3	Test Phase	Saline	0	0	0	0	0	0	0	0	0	0
4	Test Phase	Saline	0	0	0	0	0	0	0	0	0	0
5	Test Phase	Saline	0	0	0	0	0	0	0	0	0	0
6	Test Phase	Saline	0	0	0	0	0	0	0	0	0	0
7	Test Phase	Saline	0	0	0	0	0	0	0	0	0	0
8	Test Phase	Saline	0	0	0	0	0	0	0	0	0	0
9	Test Phase	Saline	2	0	0	0	0	0	0	0	0	0
10	Test Phase	5 mg/kg	6	7	2	0	0	0	0	0	0	0
11	Test Phase	5 mg/kg	29	25	15	12	3	4	0	0	0	0
12	Test Phase	5 mg/kg	18	12	8	7	8	3	1	0	0	0
13	Test Phase	5 mg/kg	7	11	8	4	3	0	0	0	0	0
14	Test Phase	5 mg/kg	8	14	13	4	3	2	2	0	0	0
15	Test Phase	5 mg/kg	7	3	0	0	0	0	0	0	0	0
16	Test Phase	30 mg/kg	26	21	13	16	10	9	10	4	4	3
17	Test Phase	30 mg/kg	3	2	0	1	2	1	0	0	0	1
18	Test Phase	30 mg/kg	8	17	16	12	9	8	9	7	6	4
19	Test Phase	30 mg/kg	12	10	13	9	6	8	0	3	2	0
20	Test Phase	30 mg/kg	21	21	15	9	9	11	5	5	2	1
21	Test Phase	30 mg/kg	23	20	1	2	14	2	3	3	3	3
												Outliers
												*** Grub Test

## Sheet: EVO. Locomotion
	NORT Inmediate														NORT 2 hours
ID	Test	Dose	0-1 min	1-2 min	2-3 min	3-4 min	4-5 min	5-6 min	6-7 min	7-8 min	8-9 min	9-10 min		ID	Test	Dose	0-1 min	1-2 min	2-3 min	3-4 min	4-5 min	5-6 min	6-7 min	7-8 min	8-9 min	9-10 min
1	Training Phase	Saline	864.73	1162.18	922.661	795.735	735.753	1195.61	987.408	808.067	413.683	1281.37		1	Training Phase	Saline	1137.4	833.99	836.353	716.231	681.214	651.344	673.302	684.775	446.153	558.266
2	Training Phase	Saline	1053.91	740.336	503.926	622.751	591.602	592.069	570.559	306.575	426.165	576.727		2	Training Phase	Saline	887.724	652.878	449.213	650.918	519.016	498.123	335.894	485.506	528.601	486.834
3	Training Phase	Saline	1007.81	776.841	577.269	543.981	594.675	461.606	570.45	491.611	527.573	326.685		3	Training Phase	Saline	1006.56	775.265	714.656	598.816	642.607	788.834	699.212	625.336	691.239	688.562
4	Training Phase	Saline	3739.15	2722.49	4171.56	2724.42	2445.59	2751.18	3324.86	2774.63	2367.36	3153.59		4	Training Phase	Saline	960.432	669.164	555.191	675.135	712.199	649.915	673.894	767.575	700.453	572.888
5	Training Phase	Saline	686.033	576.283	372.203	284.855	377.547	239.615	445.68	387.665	438.726	523.63		5	Training Phase	Saline	3739.15	2722.49	4171.56	2724.42	2445.59	2751.18	3324.86	2774.63	2367.36	3153.59
6	Training Phase	Saline	1596.16	1329.95	774.79	605.473	1089.07	1239.05	1118.27	788.028	918.773	752.043		6	Training Phase	Saline	1006.18	706.563	546.209	703.501	574.029	695.02	639.344	778.046	486.494	498.701
7	Training Phase	Saline	1139.62	1184.7	1104.67	821.444	669.396	584.418	750.522	666.024	524.547	637.798		7	Training Phase	Saline	2548.92	2853.47	1819.59	2342.06	3106.65	2363.41	2609.94	3340	3317.02	3116
8	Training Phase	Saline	650.796	242.838	500.634	441.324	320.615	334.209	404.248	390.76	415.784	487.954		8	Training Phase	Saline	686.033	576.283	372.203	284.855	377.547	239.615	445.68	387.665	438.726	523.63
9	Training Phase	Saline	815.665	562.077	226.599	591.136	577.42	584.326	630	426.248	685.686	869.284		9	Training Phase	Saline	650.796	242.838	500.634	441.324	320.615	334.209	404.248	390.76	415.784	487.954
10	Training Phase	5 mg/kg	1094.45	882.384	1343.61	1927.41	1485.8	2794.08	2673.8	884.618	845.367	643.77		10	Training Phase	5 mg/kg	895.106	631.665	646.858	558.573	532.17	537.556	615.446	661.731	554.03	567.335
11	Training Phase	5 mg/kg	539.506	324.974	230.888	392.192	307.366	388.8	286.798	519.15	421.426	573.895		11	Training Phase	5 mg/kg	834.241	711.885	659.424	618.242	552.531	265.987	484.558	419.847	614.739	559.723
12	Training Phase	5 mg/kg	922.315	827.156	552.412	487.048	535.644	572.363	571.176	509.888	594.785	427.58		12	Training Phase	5 mg/kg	1596.16	1329.95	774.79	605.473	1089.07	1239.05	1118.27	788.028	918.773	752.043
13	Training Phase	5 mg/kg	2179.05	2629.38	2392.8	2316.75	1291.16	883.631	746.775	1076.49	2474.92	2000.57		13	Training Phase	5 mg/kg	539.506	324.974	230.888	392.192	307.366	388.8	286.798	519.15	421.426	573.895
14	Training Phase	5 mg/kg	1159.53	1261.97	937.292	675.229	1673.41	689.488	673.433	521.996	505.758	555.821		14	Training Phase	5 mg/kg	922.315	827.156	552.412	487.048	535.644	572.363	571.176	509.888	594.785	427.58
15	Training Phase	5 mg/kg	970.768	522.67	400.998	461.599	351.378	517.757	548.899	729.198	865.406	771.171		15	Training Phase	5 mg/kg	2179.05	2629.38	2392.8	2316.75	1291.16	883.631	746.775	1076.49	2474.92	2000.57
16	Training Phase	30 mg/kg	895.106	631.665	646.858	558.573	532.17	537.556	615.446	661.731	554.03	567.335		16	Training Phase	30 mg/kg	1216.1	1239.34	1082.63	731.188	619.773	527.361	581.297	538.679	478.043	461.922
17	Training Phase	30 mg/kg	960.432	669.164	555.191	675.135	712.199	649.915	673.894	767.575	700.453	572.888		17	Training Phase	30 mg/kg	988.809	806.934	685.091	560.671	638.756	754.247	697.935	608.4	661.752	682.683
18	Training Phase	30 mg/kg	888.645	903.011	722.393	702.815	689.515	760.576	577.49	823.845	419.932	348.107		18	Training Phase	30 mg/kg	893.675	631.207	644.464	555.647	531.526	529.78	613.82	658.841	552.731	562.926
19	Training Phase	30 mg/kg	2548.92	2853.47	1819.59	2342.06	3106.65	2363.41	2609.94	3340	3317.02	3116		19	Training Phase	30 mg/kg	4060.52	4183.9	4798.72	4462.52	5064.03	5009.26	5353.52	4269.66	3150.04	4889.83
20	Training Phase	30 mg/kg	946.711	441.09	493.896	403.556	435.096	700.649	407.801	499.747	724.994	571.469		20	Training Phase	30 mg/kg	1015.63	745.025	725.174	625.721	735.079	661.926	811.914	870.726	820.706	591.908
21	Training Phase	30 mg/kg	751.397	712.872	510.94	518.184	582.579	545.753	435.938	428.812	559.154	538.193		21	Training Phase	30 mg/kg	1139.62	1184.7	1104.67	821.444	669.396	584.418	750.522	666.024	524.547	637.798
22	Test Phase	Saline	1417.01	742.59	530.906	561.764	529.884	745.688	315.779	223.481	458.168	569.64		22	Test Phase	Saline	2430.84	3623.29	3124.78	3632.62	2324.06	1905.47	1821.35	2500.21	1447.7	1601.21
23	Test Phase	Saline	1897.39	1121.71	755.111	452.344	269.054	352.732	378.193	492.232	927.586	928.669		23	Test Phase	Saline	632.671	977.475	1719.09	711.708	759.154	920.74	1070.32	729.894	1722.83	1662.3
24	Test Phase	Saline	1336.54	1004.83	293.959	184.568	360.721	490.669	758.364	335.358	383.37	445.542		24	Test Phase	Saline	3352.02	4405.61	2964.26	4829.92	2834.11	2549.93	3920.72	4058.63	3199.18	3068.1
25	Test Phase	Saline	2562.36	937.806	696.05	830.832	946.457	439.855	1300.84	725.325	640.558	609.881		25	Test Phase	Saline	806.25	594.17	738.207	676.304	534.48	610.048	681.927	708.908	608.436	414.69
26	Test Phase	Saline	1383.27	773.22	2332	624.772	665.838	654.133	646.134	832.507	1371.48	990.815		26	Test Phase	Saline	3726.39	3918.05	2866.63	3810.25	3345.39	2933.68	2941.11	3473.05	4869.21	2688.62
27	Test Phase	Saline	805.565	851.67	872.597	877.487	722.723	783.949	631.958	944.691	572.34	938.842		27	Test Phase	Saline	1368.89	1163.24	1937.51	1098.57	1535.43	2444.74	2483.83	2975.19	1634.57	1999.08
28	Test Phase	Saline	1056.53	1899.74	1210.43	1040.31	735.599	566.661	904.728	787.042	931.668	1296.68		28	Test Phase	Saline	1004.82	1505.46	1820.31	2103.62	2045.89	1441.24	1845.17	1536.38	2185.08	1641.05
29	Test Phase	Saline	1382.85	267.387	239.867	495.375	544.51	452.25	686.577	768.119	423.451	96.3185		29	Test Phase	Saline	3629.41	2674.22	3071.72	2662	3393.7	2397.31	2744.24	3117.18	2318.76	1705.5
30	Test Phase	Saline	1223.04	1178.19	595.585	306.438	784.784	987.316	94.2663	354.666	537.933	528.625		30	Test Phase	Saline	243.815	467.061	358.461	479.515	257.203	291.688	298.687	281.908	244.375	309.126
31	Test Phase	5 mg/kg	1479.04	1269.37	1335.45	1226.31	1111.23	1017.84	873.767	657.911	754.57	552.01		31	Test Phase	5 mg/kg	517.288	506.449	997.144	1331.06	1114.66	704.639	527.474	1033.36	811.128	605.557
32	Test Phase	5 mg/kg	881.149	1117.03	1102.86	903.62	792.563	424.168	206.569	349.576	369.877	292.432		32	Test Phase	5 mg/kg	1050.85	768.81	723.179	2154.74	1421.3	2447.77	1894.79	1586.16	462.181	1359.38
33	Test Phase	5 mg/kg	644.25	810.972	1086.41	766.16	794.095	729.184	952.18	1210.52	894.971	980.038		33	Test Phase	5 mg/kg	573.58	691.798	336.482	606.654	375.154	635.736	455.607	672.27	817.85	282.491
34	Test Phase	5 mg/kg	326.545	613.475	587.843	588.533	649.43	717.426	665.434	665.29	501.219	570.296		34	Test Phase	5 mg/kg	327.013	248.22	218.614	252.298	293.037	215.019	173.802	237.29	179.64	199.193
35	Test Phase	5 mg/kg	1196.32	1558.28	1720.24	2140.07	2072.03	1733.81	1253.56	1053.65	850.552	580.817		35	Test Phase	5 mg/kg	717.801	732.682	868.121	375.314	765.199	1263.93	827.087	717.492	1109.59	835.955
36	Test Phase	5 mg/kg	559.039	974.863	718.269	1678.91	1248.69	1196.09	154.689	117.911	125.56	419.298		36	Test Phase	5 mg/kg	1629.45	591.422	1960.92	1072.78	928.191	1786.55	1389.07	940.987	88.3956	1634.27
37	Test Phase	30 mg/kg	336.336	1110.05	1012.67	916.402	813.148	792.899	770.044	688.395	777.906	747.795		37	Test Phase	30 mg/kg	844.395	610.513	280.364	389.06	347.502	715.303	910.232	397.998	600.453	410.905
38	Test Phase	30 mg/kg	226.332	490.909	542.589	439.38	463.448	491.606	445.32	489.887	541.002	404.106		38	Test Phase	30 mg/kg	3353.71	4331.06	2982.38	4833.72	2831.14	2566.23	3870.43	4052.98	3167.28	3058.04
39	Test Phase	30 mg/kg	945.691	912.509	941.341	991.069	778.136	852.527	881.76	765.789	691.667	627.686		39	Test Phase	30 mg/kg	522.573	509.647	1008.44	1354.84	1145.27	713.708	531.676	1063.73	821.8	613.202
40	Test Phase	30 mg/kg	271.855	160.351	566.351	173.694	453.55	787.165	990.182	2078.41	2618.03	2687.96		40	Test Phase	30 mg/kg	4851.88	5526.75	4282.15	4132.63	3187.68	3554.77	3193.18	3399.69	3364.57	4034.67
41	Test Phase	30 mg/kg	736.589	777.506	446.463	468.057	531.172	541.371	538.931	500.703	582.731	702.663		41	Test Phase	30 mg/kg	1733.5	1065.89	2066.3	909.405	1470.06	960.507	657.398	869.388	1052.82	1827.62
42	Test Phase	30 mg/kg	682.046	391.331	86.1348	60.7533	249.971	69.8704	101.814	147.715	366.666	640.857		42	Test Phase	30 mg/kg	545.463	502.467	645.834	782.803	618.622	1000.33	515.487	834.25	611.081	916.397
												Outliers
												*** Grub Test

## Sheet: Western Blot
	2 hours														24 hours
ID	Area	Dose	mTOR	pmTOR	pmTOR/Mtor	Akt	pAkt	pAkt/Akt	PSD95	ERK	pERK	pERK/ERK		ID	Area	Dose	mTOR	pmTOR	pmTOR/Mtor	Akt	pAkt	pAkt/Akt	PSD95	ERK	pERK	pERK/ERK
1	HPC	Saline	0.81	0.85	1.03	0.87	0.87	1	0.77	0.98	0.48	0.489796		19	HPC	Saline	1.05	1.11	1.06	0.95	1.04	1.08	0.94	1.02	0.92	0.9
2	HPC	Saline	1.19	1.15	0.97	1.13	1.13	1	1.26	1.02	1.52	1.4902		20	HPC	Saline	0.95	0.89	0.94	1.05	0.96	0.92	1.05	0.98	1.08	1.1
3	HPC	Saline	1.18	1	0.83	1.02	1.08	1.05	0.97	1	0.99	0.99		21	HPC	Saline	0.65	0.72	1.08	0.98	1.04	1.06	1.01	1.06	0.75	0.7
4	HPC	Saline	0.82	1	1.17	0.98	0.92	0.95	0.85	1	1.01	1.01		22	HPC	Saline	1.35	1.28	0.92	1.02	0.96	0.94	0.77	0.94	1.25	1.3
5	HPC	Saline	1.07	1.27	1.19	1.14	1.17	1.03	0.84	0.99	1.25	1.26263		23	HPC	Saline	1.06	1.06	1	0.99	0.99	1.01	1.21	0.99	0.65	0.66
6	HPC	Saline	0.93	0.73	0.81	0.86	0.83	0.97	1.31	1.01	0.75	0.742574		24	HPC	Saline	0.94	0.94	1	1.01	1.01	0.99	1.01	1.01	1.35	1.34
7	HPC	5 mg/kg	0.8	0.76	0.94	1.11	1.45	1.3	0.54	1.05	4.09	3.89524		25	HPC	5 mg/kg	0.94	1.17	1.26	0.97	1.07	1.09	1.19	1	1.53	1.53
8	HPC	5 mg/kg	1.17	1.45	1.19	1.55	1.72	1.11	0.97	1.15	4	3.47826		26	HPC	5 mg/kg	0.89	1.21	1.37	1.01	1.08	1.06	1.01	1.06	2.21	2.09
9	HPC	5 mg/kg	0.97	1.16	1.18	0.76	0.97	1.28	0.97	0.66	0.75	1.13636		27	HPC	5 mg/kg	1.04	1.25	1.16	1.08	1.02	0.94	1.24	1.14	1.65	1.43
10	HPC	5 mg/kg	0.82	1.27	1.46	0.86	1.07	1.25	1.31	0.72	0.81	1.125		28	HPC	5 mg/kg	1.14	1.62	1.37	0.98	0.92	0.93	1.01	0.39	1.09	2.82
11	HPC	5 mg/kg	0.55	0.43	0.82	0.56	0.61	1.11	0.45	0.46	0.7	1.52174		29	HPC	5 mg/kg	1.07	1.37	1.27	0.98	1.01	1.04	1.25	0.91	1.88	2.05
12	HPC	5 mg/kg	0.96	0.84	0.93	0.58	0.68	1.16	0.98	0.65	0.46	0.707692		30	HPC	5 mg/kg	0.63	0.96	1.5	0.98	0.97	0.98	0.94	0.97	1.8	1.86
13	HPC	30 mg/kg	1.28	1.14	0.87	1.09	1.61	1.47	1.26	1.07	1.63	1.52336		31	HPC	30 mg/kg	0.93	1.27	1.36	1.04	1.1	1.05	1.05	0.91	1.55	1.69
14	HPC	30 mg/kg	1.11	1.18	1.01	1.32	1.37	1.03	0.83	1.07	2.31	2.15888		32	HPC	30 mg/kg	0.62	0.67	1.08	0.92	0.98	1.07	1.02	1.12	1.55	1.38
15	HPC	30 mg/kg	0.94	1.09	1.11	1.14	1.84	1.63	0.84	0.89	1.64	1.8427		33	HPC	30 mg/kg	1.13	1.26	1.27	0.96	0.99	1.03	1.21	0.87	1.53	1.73
16	HPC	30 mg/kg	0.67	1.1	1.6	0.97	1.37	1.43	1.13	0.97	1.03	1.06186		34	HPC	30 mg/kg	0.95	1.18	1.2	1.01	1.04	1.03	1.17	0.86	1.48	1.73
17	HPC	30 mg/kg	0.83	0.71	0.92	1.11	1.52	1.38	1.23	1.01	3.11	3.07921		35	HPC	30 mg/kg	1.56	2.19	1.38	0.97	0.99	1.01	1.4	0.99	1.83	1.85
18	HPC	30 mg/kg	1.26	0.96	0.8	0.6	1.65	1.08	1.01	0.73	0.77	1.05479		36	HPC	30 mg/kg	0.64	0.83	1.27	0.89	0.9	1.01	0.9	0.99	1.25	1.26
1	vmPFC	Saline	1	1	1	1	1	1	1	1	1	1
2	vmPFC	Saline	0.851452	1.08276	1.27166	1.78696	0.946531	0.529687	1.02362	1.02238	1.3696	1.33962		19	vmPFC	Saline	0.905954	0.90759	1.00181	0.559436	0.4012	0.717151	0.85895	0.772486	0.75025	0.971216
3	vmPFC	Saline	1.08456	0.988069	0.911033	2.31183	0.977815	0.422962	1.04616	1.13272	1.11684	0.985977		20	vmPFC	Saline	0.825504	0.855928	1.03685	0.290155	0.129677	0.446925	0.411461	0.595736	0.532262	0.893453
4	vmPFC	Saline	0.51501	0.471041	0.914625	0.373288	0	0	1.11554	1.22635	1.5716	1.28153		21	vmPFC	Saline	0.486453	0.430347	0.884662	0.346356	0.268227	0.774426	0.437388	0.635735	0.452151	0.711226
5	vmPFC	Saline	0.218484	0.116893	0.535017	1.04201	0.5474	0.52533	0.640444	0.549003	0.440869	0.803035		22	vmPFC	Saline	0.647441	0.141736	0.218917	0.7915	0.50335	0.635944	0.57364	0.652966	0.667009	1.02151
6	vmPFC	5 mg/kg	1.55947	1.6702	1.071	5.93385	4.80464	0.809701	1.57141	1.22901	3.10564	2.52695		23	vmPFC	Saline	0.687677	0.307031	0.446476	1.27764	0.64413	0.504155	1.64531	0.599839	0.625914	1.04347
7	vmPFC	5 mg/kg	1.48722	0.543303	0.365315	6.00615	1.61013	0.26808	1.8404	1.53164	4.0233	2.6268		24	vmPFC	5 mg/kg	0.618529	0.248451	0.401681	0.734467	0.48702	0.663094	0.685744	0.715877	0.629663	0.879569
8	vmPFC	5 mg/kg	0.612912	0.208737	0.340567	6.59346	4.38229	0.664642	1.27821	1.46132	2.99905	2.05228		25	vmPFC	5 mg/kg	0.866814	0.420236	0.484805	0.78104	0.538769	0.689809	0.454478	0.564816	0.286053	0.506453
9	vmPFC	5 mg/kg	0.851468	0.12167	0.142895	5.24348	3.47744	0.663195	1.23704	1.50689	3.85785	2.56013		26	vmPFC	5 mg/kg	0.633135	0.332892	0.525784	0.595759	0.857304	1.43901	0.225187	0.547886	0.219748	0.401083
10	vmPFC	5 mg/kg	0.667307	1.21374	1.81886	5.80218	6.32118	1.08945	1.10932	1.33177	3.50136	2.62911		27	vmPFC	5 mg/kg	0.7627	0.30976	0.406135	0.59646	0.836329	1.40215	0.406559	0.656216	0.49854	0.75972
11	vmPFC	5 mg/kg	1.47166	0.943251	0.640943	7.59004	6.94191	0.914608	1.91912	1.4365	3.63535	2.5307		28	vmPFC	5 mg/kg	0.392047	0.205976	0.525385	0.805619	1.12546	1.39702	0.780708	0.859711	0.508943	0.591993
12	vmPFC	30 mg/kg	0.355217	0.144392	0.40649	0.912604	0.868859	0.952066	0.924738	0.575558	2.21642	3.8509		29	vmPFC	5 mg/kg	0.963111	0.899502	0.933954	1.1911	1.1074	0.929725	0.548381	1.2194	1.03979	0.852704
13	vmPFC	30 mg/kg	0.286343	0.125654	0.438823	1.43864	0.57536	0.399934	1.09706	0.574615	0.964092	1.6778		30	vmPFC	30 mg/kg	0.806044	0.625768	0.776345	0.62163	0.0917128	0.147536	0.479723	0.906179	0.813417	0.897634
14	vmPFC	30 mg/kg	0.322185	0.262161	0.813698	1.53677	0.42642	0.277477	0.908603	0.740915	1.21727	1.64293		31	vmPFC	30 mg/kg	0.363924	0.217954	0.5989	0.375413	0.0306892	0.0817477	0.598554	0.585577	0.573957	0.980155
15	vmPFC	30 mg/kg	0.185942	0.106441	0.572444	1.44996	0.167198	0.115313	1.27712	0.904909	1.94993	2.15484		32	vmPFC	30 mg/kg	0.908548	0.477834	0.525932	0.851919	1.28158	1.50434	0.33099	0.539774	0.533632	0.988621
16	vmPFC	30 mg/kg	0.280985	0.854767	3.04204	1.36647	0.29554	0.21628	1.93583	0.811063	1.36657	1.68491		33	vmPFC	30 mg/kg	0.26167	0.173454	0.662874	0.367957	0.531857	1.44543	0.402134	0.514021	0.257105	0.500185
17	vmPFC	30 mg/kg	0.850987	0.520762	0.611951	4.10967	0.880433	0.214235	2.81242	2.09416	4.72155	2.25462		34	vmPFC	30 mg/kg	0.639052	0.516391	0.808058	0.614951	0.214137	0.348218	0.650171	0.593253	0.539717	0.909759
18	vmPFC	Saline	1	1	1	1	1	1	1	1	1	1		35	vmPFC	30 mg/kg	0.621392	0.404262	0.650575	0.617322	0.303289	0.491298	0.399282	0.626188	0.404701	0.646293
												Outliers
												*** Grub Test

## Sheet: HeatMaps
Area	Time	Baseline					Time	Vehicle					Time	Ketamine 5 mg/kg					Time	Ketamine 30 mg/kg					Time	24 Hours 5 mg/kg					Time	24 Hours 30 mg/kg					Time	7 Days 5 mg/kg					Time	7 Days 30 mg/kg
		DS1	DS2	DS3	DS4			DS1	DS2	DS3	DS4			DS1	DS2	DS3	DS4			DS1	DS2	DS3	DS4			DS1	DS2	DS3	DS4			DS1	DS2	DS3	DS4			DS1	DS2	DS3	DS4			DS1	DS2	DS3	DS4
dHPC	0-10_min	0.893845	0.815929	0.914593	0.80547		0-10_min	0.922814	0.87514	0.910762	0.912781		0-10_min	0.889703	0.80677	0.859647	0.989464		0-10_min	0.907849	0.623467	0.862726	0.980903		0-10_min	0.950698	0.898588	0.937128	0.866285		0-10_min	0.944548	0.692102	0.870571	0.975046		0-10_min	0.890258	0.982732	0.67461	0.917389		0-10_min	0.96589	0.756162	0.923424	0.985458
	10-20_min	0.924058	0.786365	0.918787	0.81133		10-20_min	0.932143	0.816437	0.905546	0.928519		10-20_min	0.925217	0.878822	0.926325	0.905682		10-20_min	0.864126	0.936761	0.8162	0.839147		10-20_min	0.963389	0.881348	0.937283	0.914403		10-20_min	0.942024	0.763249	0.885409	0.935996		10-20_min	0.879616	0.955177	0.726204	0.948422		10-20_min	0.956498	0.795195	0.927068	0.989479
	20-30_min	0.92386	0.810214	0.900447	0.809039		20-30_min	0.92863	0.849828	0.894035	0.90145		20-30_min	0.927635	0.897596	0.908969	0.927206		20-30_min	0.866592	0.979081	0.817896	0.861835		20-30_min	0.930517	0.925308	0.921623	0.93398		20-30_min	0.927432	0.859454	0.86904	0.867339		20-30_min	0.904439	0.931857	0.776531	0.937628		20-30_min	0.955988	0.840968	0.906549	0.990606
	30-40_min	0.919599	0.813643	0.901083	0.809422		30-40_min	0.922608	0.870256	0.880532	0.884255		30-40_min	0.933388	0.888531	0.911181	0.920071		30-40_min	0.874042	0.957372	0.825401	0.842685		30-40_min	0.944441	0.913405	0.920088	0.937971		30-40_min	0.92612	0.845579	0.879842	0.876113		30-40_min	0.916504	0.897884	0.833926	0.916716		30-40_min	0.933341	0.884537	0.890251	0.979308
	40-50_min	0.907402	0.820432	0.892159	0.818549		40-50_min	0.9273	0.870474	0.877474	0.88783		40-50_min	0.9398	0.884616	0.907646	0.918935		40-50_min	0.877813	0.958922	0.829219	0.840028		40-50_min	0.922699	0.937987	0.911516	0.94002		40-50_min	0.917074	0.88608	0.852286	0.833664		40-50_min	0.921486	0.841998	0.900773	0.861029		40-50_min	0.949058	0.864215	0.894802	0.989072
	50-60_min	0.878925	0.779745	0.904641	0.857229		50-60_min	0.9012	0.881328	0.890462	0.863847		50-60_min	0.916448	0.893008	0.917635	0.91505		50-60_min	0.876718	0.945165	0.850464	0.840145		50-60_min	0.925657	0.933965	0.916792	0.932829		50-60_min	0.89403	0.867078	0.883256	0.836459		50-60_min	0.901294	0.874992	0.842247	0.919418		50-60_min	0.930646	0.861732	0.895262	0.979413
	60-70_min	0.852227	0.776289	0.898297	0.874741		60-70_min	0.934191	0.882282	0.860595	0.878521		60-70_min	0.917362	0.912088	0.891311	0.929092		60-70_min	0.94009	0.860906	0.840548	0.860497		60-70_min	0.913418	0.932651	0.919473	0.936934		60-70_min	0.926417	0.828013	0.88707	0.88684		60-70_min	0.906218	0.876747	0.857886	0.898686		60-70_min	0.942079	0.838158	0.914608	0.988112
	70-80_min	0.91026	0.817152	0.888236	0.8221		70-80_min	0.917584	0.86494	0.890173	0.885245		70-80_min	0.930109	0.9102	0.88454	0.939085		70-80_min	0.917826	0.805002	0.902178	0.887056		70-80_min	0.930851	0.93068	0.886016	0.962922		70-80_min	0.952492	0.82082	0.860674	0.903654		70-80_min	0.936127	0.869026	0.867895	0.872706		70-80_min	0.925945	0.882734	0.890892	0.978867
	80-90_min	0.915242	0.844944	0.868449	0.799397		80-90_min	0.926481	0.900514	0.850873	0.855479		80-90_min	0.922792	0.902407	0.895734	0.922687		80-90_min	0.914318	0.856183	0.875597	0.856651		80-90_min	0.946802	0.905159	0.925569	0.931656		80-90_min	0.923906	0.904024	0.829076	0.830441		80-90_min	0.930822	0.853463	0.865522	0.862383		80-90_min	0.914568	0.878831	0.906473	0.978548
	90-100_min	0.908968	0.83103	0.872624	0.816219		90-100_min	0.910243	0.877351	0.887212	0.874268		90-100_min	0.938694	0.88943	0.897714	0.925695		90-100_min	0.90769	0.850107	0.8841	0.851624		90-100_min	0.935821	0.926728	0.898143	0.951899		90-100_min	0.917706	0.900198	0.83721	0.827048		90-100_min	0.931227	0.894934	0.840223	0.896658		90-100_min	0.92293	0.891988	0.88814	0.979546
	100-110_min	0.883529	0.793509	0.898909	0.850105		100-110_min	0.932716	0.866241	0.876859	0.884725		100-110_min	0.935438	0.907146	0.880634	0.930784		100-110_min	0.905312	0.828861	0.891973	0.864507		100-110_min	0.919359	0.938221	0.914405	0.936048		100-110_min	0.895774	0.839888	0.892857	0.84902		100-110_min	0.936877	0.87035	0.874853	0.871912		100-110_min	0.941605	0.8937	0.863429	0.977447
	110-120_min	0.898897	0.850044	0.857742	0.800781		110-120_min	0.935926	0.842441	0.888328	0.911214		110-120_min	0.926012	0.906056	0.894233	0.927095		110-120_min	0.931145	0.82745	0.882115	0.87724		110-120_min	0.925587	0.934325	0.9109	0.933115		110-120_min	0.8919	0.794446	0.926436	0.888932		110-120_min	0.936465	0.886645	0.858863	0.887951		110-120_min	0.943597	0.864848	0.886731	0.981308
	120-130_min	0.883968	0.813633	0.879003	0.843162		120-130_min	0.882964	0.906791	0.85741	0.82482		120-130_min	0.95134	0.892478	0.880136	0.934311		120-130_min	0.890239	0.805284	0.92187	0.873608		120-130_min	0.929978	0.904149	0.940149	0.896146		120-130_min	0.890597	0.891095	0.866681	0.81019		120-130_min	0.904833	0.881297	0.845558	0.908401		120-130_min	0.936554	0.879517	0.893358	0.986545
	130-140_min	0.874943	0.817219	0.876868	0.844059		130-140_min	0.89431	0.897398	0.873123	0.853031		130-140_min	0.915911	0.925998	0.869473	0.946496		130-140_min	0.923958	0.850526	0.868912	0.845228		130-140_min	0.940296	0.908289	0.928492	0.924133		130-140_min	0.881188	0.893212	0.869464	0.806956		130-140_min	0.875524	0.858962	0.813701	0.896435		130-140_min	0.93259	0.925029	0.825133	0.962538
	140-150_min	0.907656	0.876233	0.844004	0.773013		140-150_min	0.936475	0.876807	0.851319	0.878623		140-150_min	0.931434	0.911246	0.86314	0.950521		140-150_min	0.88994	0.850711	0.899239	0.840044		140-150_min	0.917771	0.932981	0.919888	0.928904		140-150_min	0.898987	0.80537	0.922954	0.886004		140-150_min	0.936991	0.876421	0.848759	0.851653		140-150_min	0.908737	0.912064	0.873008	0.973384
Area	Time	Baseline					Time	Vehicle					Time	Ketamine 5 mg/kg					Time	Ketamine 30 mg/kg					Time	24 Hours 5 mg/kg					Time	24 Hours 30 mg/kg					Time	7 Days 5 mg/kg					Time	7 Days 30 mg/kg
		DS1	DS2	DS3	DS4			DS1	DS2	DS3	DS4			DS1	DS2	DS3	DS4			DS1	DS2	DS3	DS4			DS1	DS2	DS3	DS4			DS1	DS2	DS3	DS4			DS1	DS2	DS3	DS4			DS1	DS2	DS3	DS4
vmPFC	0-10_min	0.919892	0.924743	0.817157	0.890856		0-10_min	0.94049	0.936387	0.909228	0.907675		0-10_min	0.713921	0.934806	0.805821	0.706197		0-10_min	0.772226	0.956564	0.929176	0.718709		0-10_min	0.971184	0.96085	0.929774	0.933194		0-10_min	0.952119	0.969704	0.909102	0.914974		0-10_min	0.966299	0.967574	0.968066	0.943072		0-10_min	0.954444	0.934019	0.940901	0.833839
	10-20_min	0.919595	0.912492	0.803373	0.903649		10-20_min	0.93694	0.94356	0.91469	0.905305		10-20_min	0.97068	0.932341	0.911814	0.886976		10-20_min	0.748549	0.832976	0.959183	0.726488		10-20_min	0.962324	0.940041	0.949751	0.950461		10-20_min	0.944832	0.974396	0.926315	0.905941		10-20_min	0.961067	0.962349	0.970201	0.952404		10-20_min	0.941738	0.945079	0.921022	0.869041
	20-30_min	0.905503	0.911665	0.813456	0.887953		20-30_min	0.941628	0.947629	0.906638	0.911884		20-30_min	0.929187	0.891117	0.943475	0.942988		20-30_min	0.746493	0.816125	0.888203	0.725495		20-30_min	0.956602	0.931875	0.955384	0.958931		20-30_min	0.960313	0.968801	0.914947	0.918585		20-30_min	0.96475	0.960333	0.971091	0.949375		20-30_min	0.963378	0.917998	0.952837	0.843761
	30-40_min	0.89007	0.914353	0.825763	0.880097		30-40_min	0.939332	0.950297	0.909825	0.910337		30-40_min	0.942558	0.916513	0.933687	0.929105		30-40_min	0.833773	0.956351	0.916535	0.791419		30-40_min	0.971506	0.935026	0.960787	0.942034		30-40_min	0.955777	0.956283	0.894451	0.922594		30-40_min	0.965179	0.960927	0.97547	0.947593		30-40_min	0.939599	0.948802	0.924903	0.870138
	40-50_min	0.914717	0.915157	0.803287	0.886532		40-50_min	0.93251	0.951558	0.916649	0.900257		40-50_min	0.936466	0.900614	0.944314	0.936614		40-50_min	0.891877	0.948739	0.889665	0.845592		40-50_min	0.962049	0.944587	0.946411	0.951111		40-50_min	0.961737	0.950052	0.913607	0.949433		40-50_min	0.929993	0.946094	0.956504	0.958313		40-50_min	0.944204	0.925302	0.943088	0.872183
	50-60_min	0.89297	0.918284	0.827761	0.863248		50-60_min	0.924472	0.958046	0.92289	0.885398		50-60_min	0.941764	0.931226	0.918708	0.91783		50-60_min	0.900271	0.947011	0.875668	0.859745		50-60_min	0.969516	0.936456	0.964879	0.944273		50-60_min	0.908717	0.946351	0.962601	0.900827		50-60_min	0.96341	0.972962	0.957043	0.937184		50-60_min	0.920386	0.921265	0.928403	0.88546
	60-70_min	0.879287	0.922442	0.848289	0.845616		60-70_min	0.947879	0.93731	0.902459	0.91445		60-70_min	0.937005	0.921843	0.928513	0.921326		60-70_min	0.88891	0.953106	0.883944	0.843942		60-70_min	0.974249	0.945041	0.956747	0.933856		60-70_min	0.984285	0.921065	0.863399	0.968345		60-70_min	0.967042	0.967956	0.964524	0.940085		60-70_min	0.933424	0.919239	0.942193	0.884796
	70-80_min	0.903577	0.889452	0.820263	0.897248		70-80_min	0.954809	0.922605	0.891232	0.933321		70-80_min	0.93699	0.930177	0.912593	0.917494		70-80_min	0.929658	0.920518	0.84294	0.905729		70-80_min	0.972723	0.935677	0.967177	0.933895		70-80_min	0.93652	0.975134	0.929789	0.900199		70-80_min	0.962535	0.957067	0.970439	0.95142		70-80_min	0.939138	0.937666	0.933757	0.878917
	80-90_min	0.861318	0.91396	0.867066	0.843423		80-90_min	0.957329	0.938437	0.888306	0.92064		80-90_min	0.941453	0.934033	0.911661	0.912582		80-90_min	0.93971	0.916963	0.830082	0.904913		80-90_min	0.961993	0.936763	0.952952	0.951876		80-90_min	0.906722	0.949668	0.966149	0.898892		80-90_min	0.946753	0.9468	0.962232	0.958366		80-90_min	0.922343	0.909345	0.935888	0.899625
	90-100_min	0.893198	0.927572	0.825924	0.864827		90-100_min	0.956419	0.934452	0.889507	0.93273		90-100_min	0.940283	0.957147	0.880701	0.878448		90-100_min	0.950205	0.894871	0.811984	0.926166		90-100_min	0.981369	0.934218	0.960197	0.919209		90-100_min	0.969949	0.957176	0.897685	0.921594		90-100_min	0.969682	0.979447	0.955916	0.931394		90-100_min	0.95085	0.872598	0.970353	0.844348
	100-110_min	0.888402	0.911099	0.838262	0.8591		100-110_min	0.955878	0.917435	0.888943	0.940597		100-110_min	0.972683	0.93338	0.923735	0.89276		100-110_min	0.957282	0.877908	0.786246	0.940372		100-110_min	0.967053	0.943853	0.950061	0.941172		100-110_min	0.946827	0.934468	0.906384	0.925165		100-110_min	0.979542	0.973122	0.948605	0.904486		100-110_min	0.968027	0.895835	0.966261	0.838053
	110-120_min	0.86069	0.917551	0.865933	0.825774		110-120_min	0.944541	0.928068	0.907436	0.922572		110-120_min	0.949925	0.919047	0.931549	0.921415		110-120_min	0.943397	0.902267	0.827477	0.910752		110-120_min	0.965163	0.913721	0.97658	0.947473		110-120_min	0.978558	0.925643	0.88833	0.964001		110-120_min	0.954106	0.978045	0.942148	0.92852		110-120_min	0.98261	0.860075	0.98629	0.779536
	120-130_min	0.865845	0.929897	0.855663	0.840185		120-130_min	0.945165	0.920509	0.886113	0.915783		120-130_min	0.9689	0.923266	0.929746	0.883683		120-130_min	0.936162	0.91132	0.842968	0.893676		120-130_min	0.958313	0.927722	0.954254	0.944667		120-130_min	0.951993	0.929463	0.926866	0.94768		120-130_min	0.97348	0.933201	0.968303	0.911815		120-130_min	0.974322	0.849493	0.978303	0.813163
	130-140_min	0.87006	0.921315	0.859222	0.83783		130-140_min	0.934702	0.93505	0.924898	0.90461		130-140_min	0.944318	0.930928	0.912659	0.918012		130-140_min	0.97505	0.86358	0.767559	0.932091		130-140_min	0.971667	0.953191	0.934687	0.935686		130-140_min	0.924855	0.953129	0.958038	0.897483		130-140_min	0.980967	0.943047	0.973589	0.909336		130-140_min	0.963255	0.92797	0.947879	0.832138
	140-150_min	0.872192	0.90668	0.86434	0.84238		140-150_min	0.918695	0.966523	0.908497	0.886871		140-150_min	0.907127	0.906451	0.909863	0.945765		140-150_min	0.97082	0.88294	0.775951	0.928744		140-150_min	0.977356	0.977504	0.909228	0.90858		140-150_min	0.966746	0.94117	0.904503	0.958031		140-150_min	0.9309	0.924666	0.958255	0.944483		140-150_min	0.940253	0.935917	0.928364	0.887921

[truncated: 7 more sheets: Power, Peak Frecuency, Excitation Inhibition Bal, PAC, PLV, Mutual Information, Sleep]
